# Supplementary material for: Dapagliflozin-affected endothelial dysfunction and altered gut microbiota in mice with heart failure
Source: PubMed Central journal article supplement (PMC10386824; doi:10.7717/peerj.15589), 2023-07-26

$\alpha$ -SMA

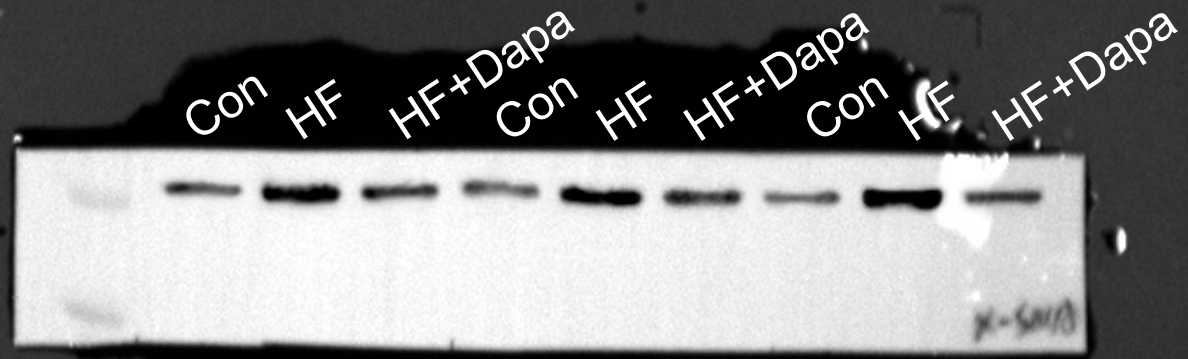

Collagen I

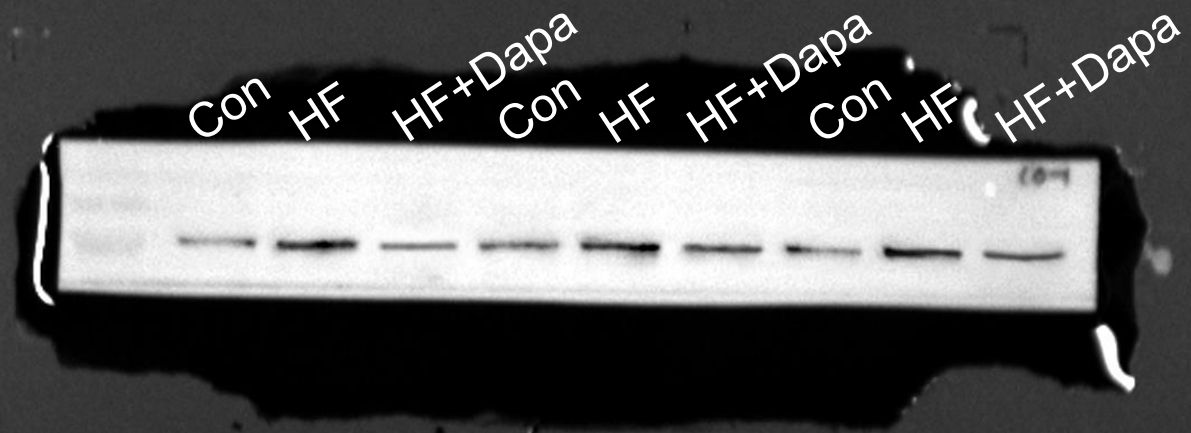

Collagen III

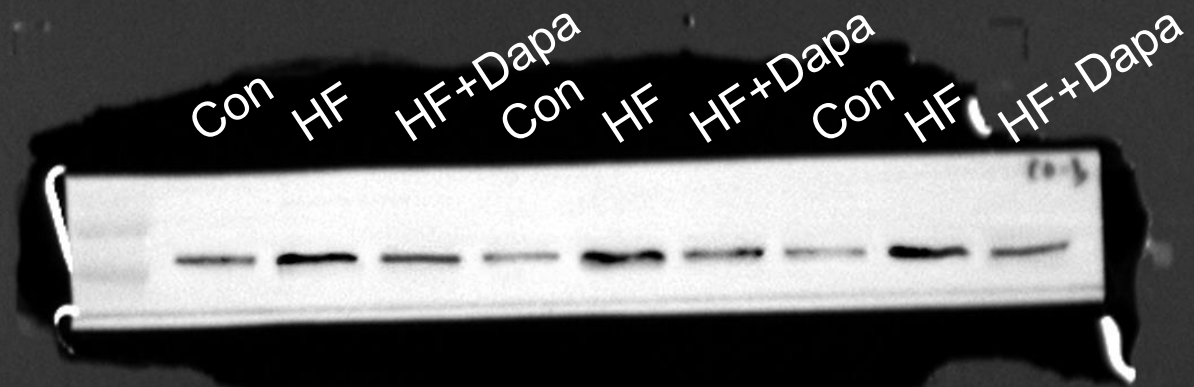

CTGF

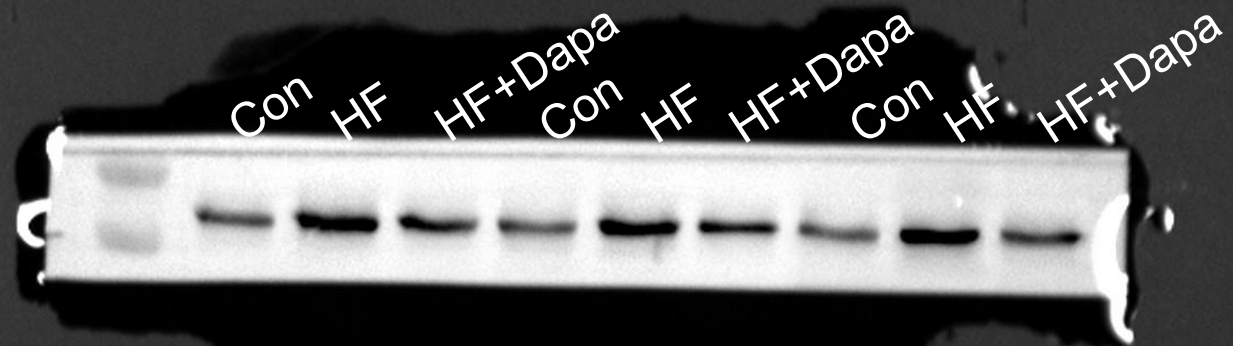

FN

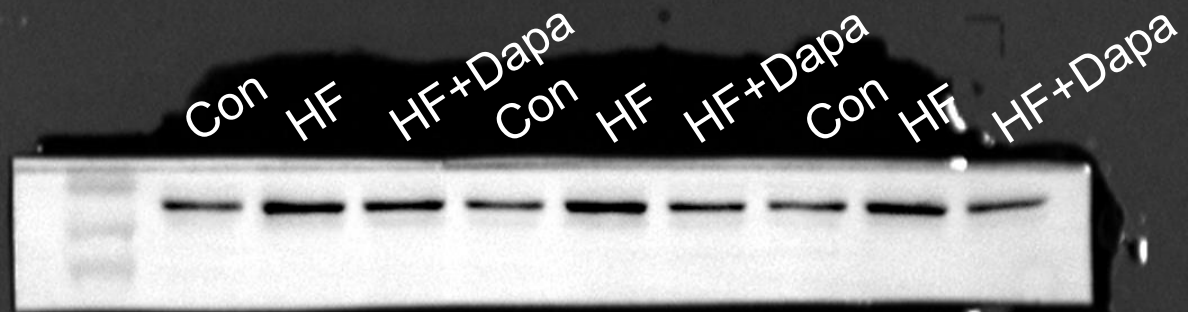

GAPDH

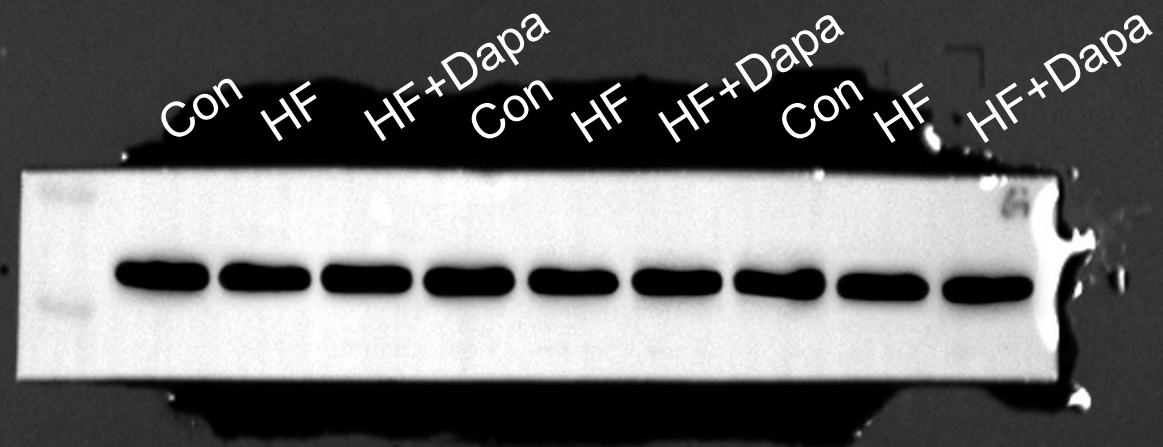

Supplement: peerj-11-15589-s015.pdf [file peerj-11-15589-s015.pdf]
