# Supplementary material for: Dapagliflozin-affected endothelial dysfunction and altered gut microbiota in mice with heart failure
Source: PeerJ. 2023 Jul 26;11:e15589. doi: 10.7717/peerj.15589 (PMC10386824; doi:10.7717/peerj.15589)
Supplement: Supplemental Information 13 [file peerj-11-15589-s013.xlsx]

## Sheet: B
	Con					HF					HF+Dapa
0	73.37	76.68	78.42	75.68	74.19	70.71	76.53	65.37	72.01	72.12	76.54	69.47	70.2	72.97	75.24
1	74.74	69.85	70.4	70.22	72.14	75.08	76.34	79.92	73.65	82.57	78.15	75.45	80.5	73.16	73.8
2	74.96	71.62	77.69	72.26	76.49	81.9	89.36	86.76	86.62	85.57	78.9	76.78	77.04	75.29	79.62
3	74.21	70.29	70.05	69.39	72.42	92	92.96	89.14	85.81	91.74	82.64	77.46	81.88	79.64	81.19
4	70.47	71.27	74.59	75.19	73.47	88.19	91.48	88.52	89.26	84.73	77.43	78.01	79.94	77.29	76.38
5	72.28	72.05	76.84	72.73	73.21	88.86	90.5	90.68	95.42	88.98	78.03	75.33	78.18	79.67	80.46
6	70.02	71.09	70.1	74.64	75.53	90.56	87.31	89.25	91.37	93.8	80.39	78.24	82.57	76.93	79.56
7	72.29	67.81	67.99	70.54	73.11	93.83	90.92	94.24	91.45	87.75	82.73	78.99	81.2	79.08	86.02
8	71.51	71.58	70.14	72.84	75.36	99.81	96.07	90.84	99.6	95.32	81.13	82.67	87.23	82.51	79.74

## Sheet: C
	Con					HF					HF+Dapa
0	44.42	45.27	46.31	43.99	40.74	47.97	43.36	33.51	45.41	39.74	40.04	43.64	54.65	39.33	41.35
1	32.86	40.8	43.55	37.68	36.51	65.98	51.77	56.67	52.79	62.76	48.63	45.95	42.96	46.55	50.67
2	31.7	32.72	40.85	42.46	33.47	72.37	70.85	66.83	61.22	56.52	51.04	55.85	54.33	47.63	48.51
3	32.93	33.15	34.98	36.63	41.83	76.02	79.79	89.84	78.44	79.19	45.92	48.38	56.79	50.78	52.18
4	36.35	38.18	34.36	40.68	36.27	88.91	90.47	87.65	75	77.58	49.33	56.52	63.17	49.93	51.27
5	37	36.13	31.97	41.65	29.69	92.74	86.54	89.2	83.06	86.89	62.24	60.57	57.69	51.21	50.78
6	42.17	41.17	32.21	35.78	35.49	98.76	87.36	84.19	83.5	88.09	44.49	60.78	61.2	50.98	54.42
7	34.47	41.98	33.91	35.08	33.76	81.39	85.84	95.18	83.85	81.43	61.82	60.59	51.53	55.5	60.43
8	30.31	34.18	43.6	40.21	40.99	78.36	79.97	91.58	82.4	88.97	64.97	59.68	51.44	58.91	51.51

## Sheet: D
Con	HF	HF+Dapa
124.01	200.37	139.26
153.15	163.72	117.57
139.67	164.64	145.26
148.08	181.24	158.7
116.22	209.81	160.25

## Sheet: E
Con	HF	HF+Dapa
5.93	7.7	6
5.96	6.92	6.91
6.72	7.02	6.24
6.82	7.92	6.33
5.8	7.44	5.73

## Sheet: F
	Con					HF					HF+Dapa
0	38.61	35.74	32.97	30.04	34.47	32.81	30.13	41.1	31.62	34.67	40.04	35.87	34.36	35.14	36.63
1	35.11	36.84	32.07	36.54	31.74	26.83	20.73	22.47	19.8	25.2	26.92	24.57	18.21	19.76	25.02
2	38.77	33.13	31.08	33.28	32.04	24.92	29.51	22.36	20.92	25.55	26.46	28.04	30.73	30.44	28.19
3	35.61	38.27	37.32	32.7	31.18	24.69	20.89	20.17	16.13	23.47	20.4	19.75	21.92	26.77	27.96
4	34.71	31.55	36.47	32.81	33.9	18.62	22.26	18.86	17.73	20.48	27.09	25.73	30.85	26.71	26.65
5	34.6	32.55	34.66	35.46	31.69	19.57	23.54	22.37	23.56	21.67	27.99	29.39	29.83	28.88	31.44
6	31.24	33.06	33.17	30.29	34.66	21.53	14.73	21.24	17.76	22.68	27.61	25.4	32.97	25.52	27.91
7	32.12	40.04	39.05	34.78	35.62	15.58	12.45	18.2	19.9	14.87	25.2	32.27	29.1	26.1	27.3
8	32.2	32.57	37.19	33.64	30.94	18.27	19.19	21.42	16.93	13.37	28.54	32.07	25.1	26.58	25.76

## Sheet: G
	Con					HF					HF+Dapa
0	60.35	57.3	65.09	67.32	55.42	60.52	51.13	63.26	68.81	52.12	47.76	65.61	60.66	53.91	66.24
1	67.24	51.45	57.95	55.21	68.15	50.04	58.39	65.29	52.56	59.68	57.35	49.11	56.93	58.68	55.93
2	57.15	65.73	53.46	59.84	56.44	40.1	52.36	46.48	47.59	50.9	49.79	49.27	45.62	58.35	47.78
3	57.81	64.35	56.95	59.68	63.83	38.7	50.21	42.38	39.34	47.02	48.31	44.41	48.3	50.62	43.99
4	57.58	70.57	61.02	64.31	63.74	39.79	44.62	33.42	42.45	34.34	43.75	44.19	52.06	55.98	47.23
5	53.22	64.89	54.31	53.46	57.83	40.52	32.44	38.41	37.46	29.51	50.53	44.21	43.59	42.5	45.2
6	57.84	60.44	57.5	58.16	71.71	24.26	29.44	28.86	27.61	34.44	39.02	44.88	52.1	39.83	49.51
7	55.62	57.83	56.94	67.71	64.59	30.7	32.25	32	35.9	25.28	39.32	41.21	42.47	39.89	50.99
8	61.67	59.42	60.35	53.36	61.25	34.07	26.04	28.97	29.19	25.36	39.78	38.34	51.65	50.55	45.29
