# Supplementary material for: Dapagliflozin-affected endothelial dysfunction and altered gut microbiota in mice with heart failure
Source: PeerJ. 2023 Jul 26;11:e15589. doi: 10.7717/peerj.15589 (PMC10386824; doi:10.7717/peerj.15589)
Supplement: Supplemental Information 14 [file peerj-11-15589-s014.xlsx]

## Sheet: A
Con	HF	HF+Dapa
0	34.65	22.57
0	44.99	20.91
0	31.15	25.95
0	34.3	24.02
0	40.44	19.48

## Sheet: D
	Con					HF					HF+Dapa
α-SMA	0.48	0.32	0.35	0.5	0.41	0.82	0.92	0.78	0.89	0.98	0.29	0.56	0.35	0.6	0.47
FN	0.43	0.39	0.22	0.29	0.46	0.77	0.81	0.72	0.7	0.91	0.64	0.4	0.52	0.43	0.56
CTGF	0.37	0.38	0.38	0.45	0.29	0.8	0.94	0.8	0.99	0.93	0.29	0.34	0.54	0.58	0.46
collagen I	0.23	0.22	0.26	0.24	0.35	0.56	0.64	0.71	0.74	0.51	0.21	0.18	0.34	0.26	0.25
collagen III	0.31	0.22	0.2	0.18	0.29	0.72	0.64	0.51	0.71	0.79	0.31	0.4	0.24	0.26	0.27
